CFTR

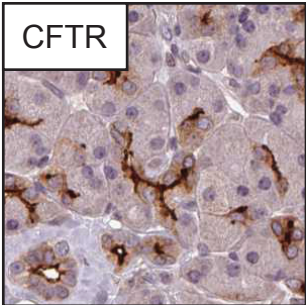

SLC4A4

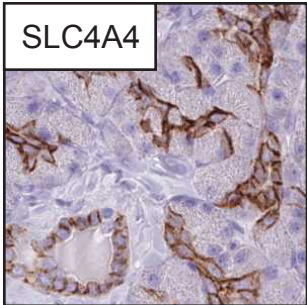

Source: https://storage.googleapis.com/plos-corpus-prod/10.1371/journal.pone.0115421/1/pone.0115421.s003.pdf
